# Supplementary material for: Are Tree Seed Systems for Forest Landscape Restoration Fit for Purpose? An Analysis of Four Asian Countries
Source: MDPI journal article supplement (doi:10.3390/d13110575), 2021-11-10
Supplement: s1 [file s1]

Archive with 6 entries (6 files):
- __MACOSX/._S1 Indicator System.pdf
- __MACOSX/._S2 Experts' survey questionnaire.pdf
- __MACOSX/._S3 FLR survey.pdf
- S1 Indicator System.pdf
- S2 Experts' survey questionnaire.pdf
- S3 FLR survey.pdf
