# Supplementary material for: Are Tree Seed Systems for Forest Landscape Restoration Fit for Purpose? An Analysis of Four Asian Countries
Source: MDPI journal article supplement (doi:10.3390/d13110575), 2021-11-10
Supplement: s1 [file s1 › S2 Experts' survey questionnaire.pdf]

Table S2: Experts survey questionnaire.

| Indicator                       | Question                                                                                                                                                          | 0                                                                                                    | 1  | 2                                                                               | 3                                                                                   | Score                                                                         | Comments |
|---------------------------------|-------------------------------------------------------------------------------------------------------------------------------------------------------------------|------------------------------------------------------------------------------------------------------|----|---------------------------------------------------------------------------------|-------------------------------------------------------------------------------------|-------------------------------------------------------------------------------|----------|
| <b>Selection and innovation</b> |                                                                                                                                                                   |                                                                                                      |    |                                                                                 |                                                                                     |                                                                               |          |
| 1                               | Different sources of information are used to identify native species useful for restoration in a variety of ecosystems                                            | Are lists of priority native species for restoration available for key ecosystems?                   | No | There are lists of priority native species for a few priority ecosystems        | There are lists of priority native species for most priority ecosystems             | There are lists of priority native species for all priority ecosystems        |          |
|                                 |                                                                                                                                                                   | Are threatened species included in the priority lists for restoration?                               | No | A few threatened species are included                                           | Many threatened species are included                                                | All threatened species are included                                           |          |
| 2                               | Research into the effect of climate change on native species across different ecosystems is used to inform selection of species and seed sourcing for restoration | Is there research on the effect of climate change on key ecosystem distribution?                     | No | One or a few key ecosystems have been studied                                   | Many key ecosystems have been studied                                               | All key ecosystems have been studied                                          |          |
|                                 |                                                                                                                                                                   | Is there research on the effect of climate change on priority native species distribution?           | No | Some priority species have been studied                                         | Many priority species have been studied                                             | All priority species have been studied                                        |          |
|                                 |                                                                                                                                                                   | Is there research on the effect of climate change used to inform planting decisions for restoration? | No | There are few examples of this research being used to inform planting decisions | There are several examples of this research being used to inform planting decisions | Research is used in inform planting decisions                                 |          |
| 3                               | Information on species genetic diversity is used to identify goal-oriented planting material                                                                      | Are there provenance trials across the country for the priority species?                             | No | There are provenance trials for a few priority species                          | There are provenance trials for many priority species                               | There are provenance trials for the priority species                          |          |
|                                 |                                                                                                                                                                   | Is data being collected from these trials?                                                           | No |                                                                                 |                                                                                     | Data is being collected                                                       |          |
|                                 |                                                                                                                                                                   | Is the data being used to inform seed source choice for restoration?                                 | No | Data is used to inform seed source choice for                                   | Data is used to inform seed source choice for restoration of many priority species  | Data is used to inform seed source choice for restoration of priority species |          |



|                                  |                                                                                                                                  |                                                                                                 |    |                                                                        |                                                                |                                                                                          |  |  |
|----------------------------------|----------------------------------------------------------------------------------------------------------------------------------|-------------------------------------------------------------------------------------------------|----|------------------------------------------------------------------------|----------------------------------------------------------------|------------------------------------------------------------------------------------------|--|--|
| 5                                | Seed sources that cover the geographical range of the priority native species have been identified and are protected effectively | Have seed sources been identified for the priority species?                                     | No | Seed sources have been identified for at least one priority species    | Seed sources have been identified for many priority species    | Seed sources have been identified for the priority species                               |  |  |
|                                  |                                                                                                                                  | Have seed sources been identified for key ecosystems?                                           | No | Seed sources have been identified for at least one key ecosystem       | Seed sources have been identified for many key ecosystems      | Seed sources have been identified for the key ecosystem                                  |  |  |
|                                  |                                                                                                                                  | Do seed sources cover the species range?                                                        | No | Identified seed sources cover a small part of the species range        | Identified seed sources cover most of the species range        | Seed sources cover the species range                                                     |  |  |
|                                  |                                                                                                                                  | Are seed sources protected effectively?                                                         | No | Seed sources received little protection                                | Seed sources receive some protection                           | Seed sources are protected effectively                                                   |  |  |
| 6                                | Improved material is available for those priority species used in production restoration                                         | Is there improved material available for those priority species used in production restoration? | No | There is improved material available for at least one priority species | There is improved material available for many priority species | There is improved material available all priority species used in production restoration |  |  |
|                                  |                                                                                                                                  | Is improved material available for the key ecosystems?                                          | No | There is improved material available for at least one key ecosystem    | There is improved material available for many key ecosystems   | There is improved material available for the key ecosystem                               |  |  |
| 7                                | Nurseries are able to produce the priority species adapted to each ecosystem                                                     | Are all the priority species being produced?                                                    | No | A few priority species are being produced                              | Most priority species are being produced                       | The priority species being produced across                                               |  |  |
|                                  |                                                                                                                                  | Are they being produced across each key ecosystem?                                              | No | Production occurs in at least one key ecosystem                        | Production occurs in many key ecosystems                       | Production occurs in the key ecosystems                                                  |  |  |
| Market access, supply and demand |                                                                                                                                  |                                                                                                 |    |                                                                        |                                                                |                                                                                          |  |  |
| 8                                | There is demand for priority native species of suitable                                                                          | Is there demand for priority native species?                                                    | No | There is little demand for priority native species                     | There is some demand for priority native species               | There is demand for priority native species                                              |  |  |

|                      |                                                                                                                                       |                                                                                                         |    |                                                |                                                                                |                                                                  |  |  |
|----------------------|---------------------------------------------------------------------------------------------------------------------------------------|---------------------------------------------------------------------------------------------------------|----|------------------------------------------------|--------------------------------------------------------------------------------|------------------------------------------------------------------|--|--|
|                      | provenance for restoration across targeted ecosystems                                                                                 | Do people request suitable provenance?                                                                  | No | There is little demand for suitable provenance | There is some demand for suitable provenance                                   | There is demand for suitable provenance                          |  |  |
| 9                    | There is a network of suppliers able to meet the demand for priority native species of suitable provenance across targeted ecosystems | Is there a network of suppliers?                                                                        | No | There are local networks of suppliers          | There are regional networks of suppliers                                       | There is a national network of suppliers                         |  |  |
|                      |                                                                                                                                       | Can the network meet demand (access and quantity) for natives with suitable provenance?                 | No |                                                | The network can meet demand for natives but there is no provenance information | The network can meet demand for natives with suitable provenance |  |  |
| Quality control      |                                                                                                                                       |                                                                                                         |    |                                                |                                                                                |                                                                  |  |  |
| 10                   | There is a certification system for seed quality for restoration planting                                                             | Does certification cover seed sourcing (population size, sampling method)?                              | No | Some aspects are covered                       | Most aspects are covered                                                       | All aspects are covered                                          |  |  |
|                      |                                                                                                                                       | Does certification cover seed harvesting (material type, permission to collect)?                        | No | Some aspects are covered                       | Most aspects are covered                                                       | All aspects are covered                                          |  |  |
| 11                   | Measures exist to comply with seed quality standards                                                                                  | Does certification cover production (phytosanitary conditions, control of origin)?                      | No | Some aspects are covered                       | Most aspects are covered                                                       | All aspects are covered                                          |  |  |
|                      |                                                                                                                                       | Does certification cover improved seeds?                                                                | No | Some aspects are covered                       | Most aspects are covered                                                       | All aspects are covered                                          |  |  |
| 12                   | Quality control measures function as an integrated system                                                                             | Do these components function as a system?                                                               | No | There is some relation between the components  | Most of the components are linked                                              | All the components are linked                                    |  |  |
| Enabling environment |                                                                                                                                       |                                                                                                         |    |                                                |                                                                                |                                                                  |  |  |
| 13                   | The seed system is underpinned by appropriate legislation and regulations                                                             | Are adequate regulations being implemented that support the use of materia suitable for climate change? | No | Not adequate or implemented                    | Adequate but not implemented or not adequate but implemented                   | Adequate and implemented                                         |  |  |

|    |                                                                                |                                                                                                                                  |    |                                   |                                                              |                                       |  |  |
|----|--------------------------------------------------------------------------------|----------------------------------------------------------------------------------------------------------------------------------|----|-----------------------------------|--------------------------------------------------------------|---------------------------------------|--|--|
|    | applied to native species and implemented                                      | Are adequate regulations being implemented to defined seed transfer zones?                                                       | No | Not adequate or implemented       | Adequate but not implemented or not adequate but implemented | Adequate and implemented              |  |  |
|    |                                                                                | Are adequate regulations being implemented to protect seed sources?                                                              | No | Not adequate or implemented       | Adequate but not implemented or not adequate but implemented | Adequate and implemented              |  |  |
|    |                                                                                | Are adequate regulations being implemented that provide incentives for the use of native species?                                | No | Not adequate or implemented       | Adequate but not implemented or not adequate but implemented | Adequate and implemented              |  |  |
|    |                                                                                | Are adequate regulations being implemented for a certification system for native species?                                        | No | Not adequate or implemented       | Adequate but not implemented or not adequate but implemented | Adequate and implemented              |  |  |
| 14 | There is appropriate capacity to support a seed system                         | Is there sufficient capacity building for decision makers?                                                                       | No | There is little capacity building | There is some capacity building                              | Capacity building is sufficient       |  |  |
|    |                                                                                | Is there sufficient capacity building for technicians?                                                                           | No | There is little capacity building | There is some capacity building                              | Capacity building is sufficient       |  |  |
|    |                                                                                | Is there sufficient capacity building for communities?                                                                           | No | There is little capacity building | There is some capacity building                              | Capacity building is sufficient       |  |  |
|    |                                                                                | Is there sufficient capacity building for the general public?                                                                    | No | There is little capacity building | There is some capacity building                              | Capacity building is sufficient       |  |  |
|    |                                                                                | Is there sufficient capacity building for students?                                                                              | No | There is little capacity building | There is some capacity building                              | Capacity building is sufficient       |  |  |
| 15 | There is sufficient financial support for key research needed for seed systems | Is there sufficient financial support for baseline information on priority native species and key ecosystems for climate change? | No | There is little financial support | There is some financial support                              | There is sufficient financial support |  |  |
|    |                                                                                | Is there sufficient financial support for seed source identification?                                                            | No | There is little financial support | There is some financial support                              | There is sufficient financial support |  |  |

|  |  |                                                                            |    |                                   |                                 |                                       |  |  |
|--|--|----------------------------------------------------------------------------|----|-----------------------------------|---------------------------------|---------------------------------------|--|--|
|  |  | Is there sufficient financial support for research on material production? | No | There is little financial support | There is some financial support | There is sufficient financial support |  |  |
|--|--|----------------------------------------------------------------------------|----|-----------------------------------|---------------------------------|---------------------------------------|--|--|
